# Supplementary material for: Hypertension prevalence, awareness, treatment and control in national surveys from England, the USA and Canada, and correlation with stroke and ischaemic heart disease mortality: a cross-sectional study
Source: HighWire-hosted journal article supplement (doi:10.1136/bmjopen-2013-003423), 2013-08-01
Supplement: bmjopen-2013-003423supp_tables.pdf [file bmjopen-2013-003423supp_tables.pdf]

Appendix 1. Mean Systolic and Diastolic Blood Pressure by Sex, Age, and Country.

|                | England |       |     |      |     | CANADA |       |     |      |     | USA  |       |     |      |     |
|----------------|---------|-------|-----|------|-----|--------|-------|-----|------|-----|------|-------|-----|------|-----|
|                | n       | SBP   | se  | DBP  | se  | n      | SBP   | se  | DBP  | se  | n    | SBP   | se  | DBP  | se  |
| <b>Males</b>   |         |       |     |      |     |        |       |     |      |     |      |       |     |      |     |
| 20-24          | 153     | 126.7 | 0.8 | 69.2 | 0.8 | 127    | 106.6 | 0.7 | 67.5 | 0.8 | 436  | 117.0 | 0.6 | 66.3 | 0.9 |
| 25-29          | 196     | 127.9 | 0.8 | 72.5 | 0.8 | 98     | 108.9 | 1.0 | 70.1 | 0.8 | 413  | 118.6 | 0.8 | 68.9 | 0.6 |
| 30-34          | 275     | 127.5 | 0.7 | 73.5 | 0.6 | 134    | 112.2 | 0.9 | 73.8 | 0.7 | 410  | 118.4 | 0.6 | 71.6 | 0.5 |
| 35-39          | 320     | 126.8 | 0.7 | 74.1 | 0.6 | 165    | 112.1 | 0.8 | 74.7 | 0.6 | 468  | 120.3 | 0.6 | 74.7 | 0.6 |
| 40-44          | 389     | 126.5 | 0.6 | 75.7 | 0.5 | 190    | 113.5 | 0.8 | 76.5 | 0.6 | 442  | 120.7 | 0.8 | 76.1 | 0.7 |
| 45-49          | 335     | 130.9 | 0.9 | 79.5 | 0.7 | 173    | 115.9 | 0.9 | 77.7 | 0.6 | 448  | 121.8 | 0.9 | 75.9 | 0.8 |
| 50-54          | 316     | 132.2 | 0.9 | 78.4 | 0.6 | 134    | 117.9 | 1.0 | 78.8 | 0.6 | 510  | 124.4 | 0.9 | 75.9 | 0.7 |
| 55-59          | 384     | 134.6 | 0.8 | 78.6 | 0.6 | 85     | 120.6 | 1.6 | 77.4 | 0.9 | 383  | 125.1 | 0.9 | 75.2 | 0.7 |
| 60-64          | 326     | 137.0 | 0.9 | 77.5 | 0.6 | 201    | 120.5 | 1.0 | 76.2 | 0.6 | 517  | 128.3 | 1.0 | 72.4 | 0.9 |
| 65-69          | 141     | 138.2 | 2.1 | 76.1 | 1.1 | 141    | 122.7 | 1.3 | 73.6 | 0.7 | 381  | 127.0 | 1.4 | 67.9 | 1.1 |
| 70-74          | 124     | 137.3 | 1.7 | 72.1 | 1.0 | 107    | 125.2 | 1.6 | 72.8 | 1.0 | 345  | 130.0 | 1.3 | 67.1 | 0.7 |
| 75-79          | 84      | 138.9 | 1.9 | 71.9 | 1.1 | 94     | 123.2 | 1.6 | 70.3 | 0.9 | 280  | 132.3 | 1.6 | 66.0 | 1.0 |
| All males      | 3,043   | 131.1 | 0.3 | 75.3 | 0.2 | 1649   | 115.1 | 0.3 | 74.5 | 0.2 | 5033 | 122.4 | 0.3 | 72.3 | 0.4 |
| <b>Females</b> |         |       |     |      |     |        |       |     |      |     |      |       |     |      |     |
| 20-24          | 215     | 112.2 | 0.6 | 67.4 | 0.5 | 100    | 101.7 | 0.9 | 66.6 | 0.8 | 423  | 108.6 | 0.6 | 64.4 | 0.6 |
| 25-29          | 252     | 112.9 | 0.6 | 69.2 | 0.6 | 142    | 98.2  | 0.7 | 63.9 | 0.7 | 388  | 109.7 | 0.5 | 66.3 | 0.7 |
| 30-34          | 348     | 113.0 | 0.6 | 70.6 | 0.5 | 172    | 103.3 | 0.8 | 69.0 | 0.6 | 404  | 109.5 | 0.7 | 67.6 | 0.7 |
| 35-39          | 462     | 115.4 | 0.6 | 72.3 | 0.5 | 221    | 103.4 | 0.8 | 69.6 | 0.6 | 452  | 112.0 | 0.7 | 71.0 | 0.5 |
| 40-44          | 492     | 118.9 | 0.7 | 74.2 | 0.5 | 192    | 105.6 | 0.8 | 69.6 | 0.6 | 488  | 113.1 | 0.8 | 70.5 | 0.7 |
| 45-49          | 414     | 123.1 | 0.9 | 76.0 | 0.6 | 204    | 111.5 | 1.0 | 73.0 | 0.7 | 486  | 117.3 | 1.0 | 71.9 | 0.8 |
| 50-54          | 383     | 125.6 | 1.0 | 76.3 | 0.6 | 133    | 115.3 | 1.2 | 73.2 | 0.7 | 452  | 120.0 | 0.7 | 72.4 | 0.6 |
| 55-59          | 451     | 129.1 | 0.9 | 75.9 | 0.5 | 120    | 114.7 | 1.4 | 71.3 | 0.8 | 377  | 124.5 | 1.3 | 71.5 | 0.8 |
| 60-64          | 403     | 131.9 | 0.9 | 75.3 | 0.5 | 193    | 123.0 | 1.3 | 72.4 | 0.6 | 536  | 127.3 | 1.0 | 70.1 | 0.8 |
| 65-69          | 183     | 135.7 | 1.4 | 73.9 | 0.8 | 146    | 129.3 | 1.5 | 73.9 | 0.8 | 343  | 128.9 | 1.5 | 66.4 | 1.2 |
| 70-74          | 121     | 140.3 | 1.8 | 73.4 | 0.8 | 114    | 125.8 | 1.4 | 69.3 | 0.9 | 365  | 134.0 | 1.2 | 64.7 | 0.8 |
| 75-79          | 106     | 144.1 | 2.0 | 71.3 | 1.1 | 99     | 134.2 | 2.2 | 70.0 | 1.0 | 256  | 135.7 | 1.2 | 61.8 | 1.2 |
| All females    | 3,830   | 123.7 | 0.4 | 73.1 | 0.2 | 1836   | 111.4 | 0.4 | 70.2 | 0.2 | 4970 | 118.1 | 0.4 | 69.0 | 0.4 |

Appendix 2. Mean Systolic (SBP) and Diastolic (DBP) Blood Pressure (mm Hg) among Hypertensive Individuals, by Awareness, Treatment and Control, and by Country.

|                            |      | ENGLAND |      | CANADA             |                   | USA   |      |
|----------------------------|------|---------|------|--------------------|-------------------|-------|------|
|                            |      | SBP     | DBP  | SBP                | DBP               | SBP   | DBP  |
| Non hypertensive           | mean | 119.9   | 71.2 | 109.3              | 71.1              | 114.8 | 69.3 |
|                            | se   | 0.2     | 0.1  | 0.2                | 0.2               | 0.2   | 0.4  |
| All, Hypertensive          | mean | 144.3   | 81.0 | 129.5              | 77.3              | 133.7 | 74.0 |
|                            | se   | 0.5     | 0.3  | 0.6                | 0.4               | 0.4   | 0.5  |
| All, Aware                 | mean | 141.7   | 78.5 | 126.1              | 75.2              | 130.8 | 72.3 |
|                            | se   | 0.6     | 0.4  | 0.6                | 0.4               | 0.4   | 0.5  |
| All, Treated               | mean | 138.8   | 75.9 | 125.2              | 74.4              | 129.0 | 71.1 |
|                            | se   | 0.7     | 0.4  | 0.6                | 0.4               | 0.4   | 0.5  |
| Treated and Controlled     | mean | 125.4   | 71.2 | 119.7              | 72.8              | 120.2 | 68.3 |
|                            | se   | 0.5     | 0.4  | 0.5                | 0.4               | 0.3   | 0.5  |
| Treated and not controlled | mean | 154.1   | 81.2 | 151.1              | 81.9              | 151.0 | 78.0 |
|                            | se   | 0.8     | 0.6  | 1.3                | 0.9               | 0.6   | 0.7  |
| Aware, not treated         | mean | 151.5   | 88.1 | 147.2 <sup>E</sup> | 93.8 <sup>E</sup> | 149.3 | 85.1 |
|                            | se   | 0.8     | 0.6  | 2.5 <sup>E</sup>   | 2.0 <sup>E</sup>  | 1.2   | 1.1  |
| Unaware                    | mean | 149.3   | 85.5 | 146.7              | 87.6              | 146.1 | 81.5 |
|                            | se   | 0.5     | 0.5  | 1.0                | 0.7               | 0.6   | 1.3  |

<sup>E</sup> Interpret with caution (coefficient of variation 16.6% to 33.3%)

Hypertension: Systolic pressure $\geq$ 140 or diastolic pressure $\geq$ 90 or currently taking blood pressure lowering medication

Aware: Self-report of having been diagnosed as hypertensive by a doctor or nurse, excluding women diagnosed during pregnancy (England);

Self-reported blood pressure medication use in the past month or self-reported high blood pressure (Canada); Self-report of having been diagnosed as hypertensive by a doctor or nurse, excluding women diagnosed during pregnancy (USA)

Treated: Taking medication to lower blood pressure recorded by the nurse (England); Taking medication to lower blood pressure, self-report (Canada, USA);

Treated and controlled: Taking medication to lower blood pressure and DBP <90 mm Hg and SBP <140 mm Hg

Treated and uncontrolled: Taking medication to lower blood pressure and DBP  $\geq 90$  mm Hg or SBP  $\geq 140$  mm Hg

Aware, not treated: Self-reported of having been diagnosed as hypertensive by a doctor or nurse, not taking medication to lower blood pressure (England); Self-reported of having been told by health care provider that they have high blood pressure, not taking medication to lower blood pressure (Canada); Self-reported of having been told by health care provider that they have high blood pressure, not taking medication to lower blood pressure (USA)

Unaware: No self report of having been diagnosed as hypertensive by a doctor or nurse (England); No self report of having been told that they have high blood pressure and no self report of blood pressure medication use in the past month (Canada); No self report of having been told that they have high blood pressure (USA)
